# Supplementary material
Source: Springer Nature journal article supplement (https://www.springermedizin.de/resource/supplementary/12887_2012_746_MOESM2_ESM.pdf/9476074)
Supplement: MOESM2 [file 9476074]

Table 2: Overview of the strength of the different associations

| Author                               | physical activity -<br>overweight | gender<br>differences | physical fitness -<br>overweight | gender<br>differences | Interaction<br>PA, fitness,<br>overweight    | gender<br>differences |
|--------------------------------------|-----------------------------------|-----------------------|----------------------------------|-----------------------|----------------------------------------------|-----------------------|
| Deforche et al.,<br>2003 [31]        | 0                                 | *                     | 3                                | ***                   |                                              |                       |
| Ng et al. [30]                       | 0                                 | n.a.                  | 3                                | X                     |                                              |                       |
| Pate et al., 2006<br>[25]            |                                   |                       | 3                                | X                     |                                              |                       |
| Ara et al., 2007<br>[29]             | 0                                 | X                     | 2                                | **                    |                                              |                       |
| Haerens et al.,<br>2007 [8]          | 1                                 | X                     | 3                                | *                     |                                              |                       |
| Ortega et al., 2007<br>[26]          | 0                                 | *                     | 1                                | X                     | n.a.<br>(data not shown)                     | n.a.                  |
| Fogelholm et al.,<br>2008 [6]        | 0                                 | n.a.                  | 2                                | X                     | n.a. (overweight =<br>mediator)              | X                     |
| Lohman et al.,<br>2008 [32]          | 1                                 | n.a.                  | 1                                | n.a.                  | 1<br>(PA = moderator)                        | n.a.                  |
| Aires et al., 2010<br>[7]            | 0                                 | n.a.                  | 1                                | n.a.                  |                                              |                       |
| Huotari et al., 2010<br>[27]         |                                   |                       | n.a.                             | *                     | BMI & PA =<br>predictors of CRF <sup>a</sup> | X                     |
| Ortega et al., 2010<br>[9]           | 0                                 | n.a.                  | 2                                | X                     | 3<br>(CRF = moderator)                       | X                     |
| Gonzales-Suarez<br>et al., 2011 [28] | 0                                 | X                     | 2                                | n.a.                  |                                              |                       |
| Aires et al., 2010<br>[33]           | 1                                 | n.a.                  | 2                                | ***                   | 1<br>(CRF = mediator)                        | *                     |
| He et al., 2011 [5]                  | 0                                 | ***                   | 2                                | ***                   |                                              |                       |

3=strong effect; 2=moderate effect; 1=low effect; 0=no effect; \*\*\*=large gender differences; \*\*=middle gender differences; \*=small gender differences; X=no gender differences; n.a.=not available

<sup>a</sup> this study did not analyze the association between PA – overweight or fitness – overweight → no information about mediator or moderator effect, so that this study was not added to interaction studies in the manuscript
